# Supplementary material
Source: Springer Nature journal article supplement (https://www.springermedizin.de/resource/supplementary/12885_2013_4205_MOESM6_ESM.pdf/9465770)

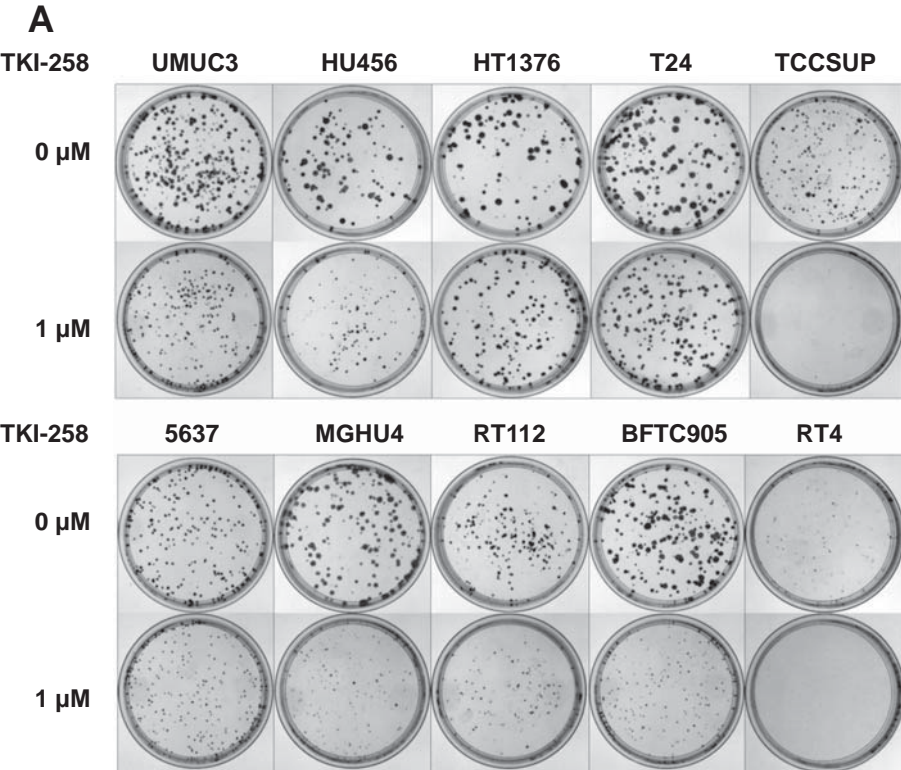

**B**

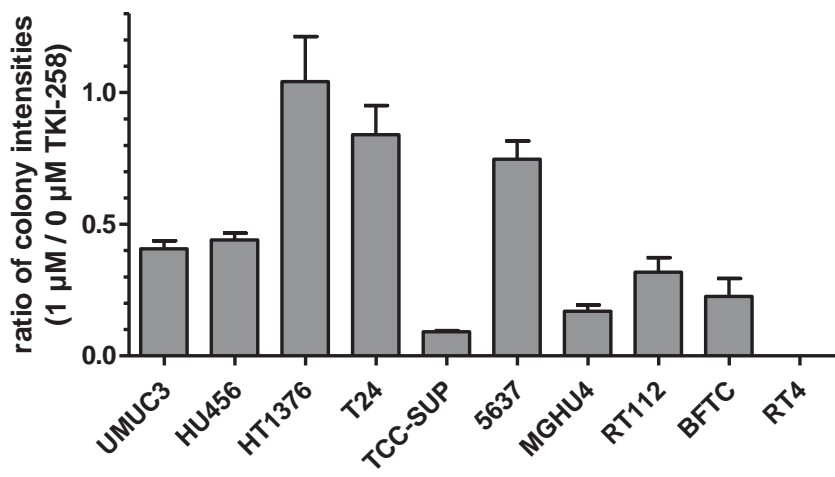

Supplement: MOESM6 [file 9465770]
